# Supplementary material for: A combinatorial optimization approach for diverse motif finding applications
Source: Springer Nature journal article supplement (doi:10.1186/1748-7188-1-13), 2006-08-17
Supplement: Additional file 1 [file 1748-7188-1-13-s1.pdf]

## Supplementary Material

| ID   | LP/DEE Motif |              | Lukashin Motif |              |
|------|--------------|--------------|----------------|--------------|
|      | Position     | Motif        | Position       | Motif        |
| ACET | 411          | VAHHEMGIQYF  | 411            | VAHHEMGIQYF  |
| AMPN | 384          | VIAHELAHQWFG | 384            | VIAHELAHQWFG |
| BMP1 | 210          | IVVHELGHVVGF | 210            | IVVHELGHVVGF |
| MM01 | 215          | VAAHELGHSLGL | 215            | VAAHELGHSLGL |
| MM02 | 400          | VAAHEFGHAMGL | 400            | VAAHEFGHAMGL |
| MM03 | 215          | VAAHEIGHSLGL | 215            | VAAHEIGHSLGL |
| LKHA | 292          | VIAHEISHSWG  | 292            | VIAHEISHSWG  |
| MEPA | 152          | IIEHEILHALGF | 152            | IIEHEILHALGF |
| PSA  | 349          | VVGHELAHQWFG | 349            | VVGHELAHQWFG |
| ACE  | 985          | VAHHEMGIQYF  | 387            | TVHHEMGIQYY  |

Table 1: Human zinc metallopeptidase motif as found by the LP/DEE method and Lukashin & Rosa [41]. All sequences are designated by their SwissProt entries with extension *HUMAN* omitted.

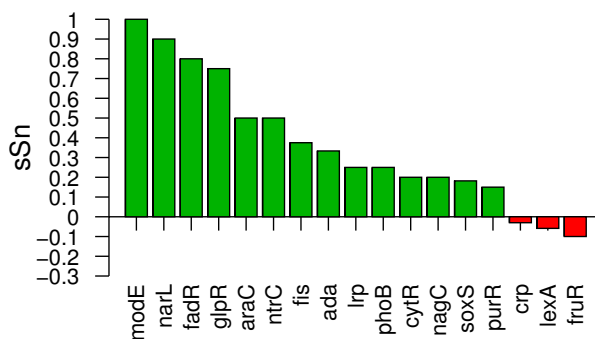

(a) Difference in site sensitivity between LP/DEE and MEME using a significance threshold.

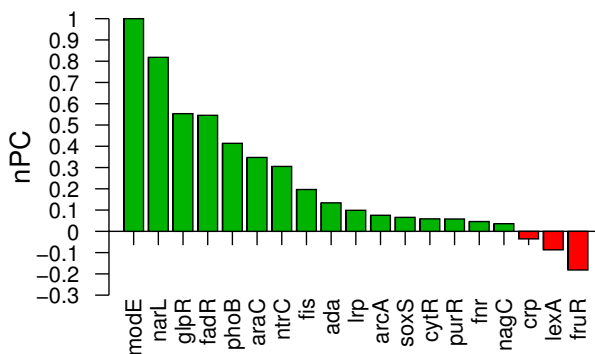

(b) Difference in nucleotide performance coefficient between LP/DEE and MEME using a significance threshold.

Figure 1: Performance comparison between the LP/DEE method and MEME when identifying known regulatory sites when using a significance threshold. For every transcription factor dataset, the height of the bar indicates the difference in the metric, with bars above zero specifying better performance for our method and bars below zero otherwise. When a method fails to report a statistically significant motif with an e-value cutoff of 1.0, the number of correctly identified nucleotides and sites is set to zero.
